# Supplementary material
Source: Copernicus journal article supplement (doi:10.5194/se-17-617-2026)
Supplement: Supplementary file 1 [file se-17-617-2026-supplement.pdf]

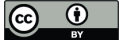

*Supplement of*

## **Interpreting the cause of bound earthquakes at underground injection experiments**

**Ryan Schultz et al.**

*Correspondence to:* Ryan Schultz ([ryan.schultz@sed.ethz.ch](mailto:ryan.schultz@sed.ethz.ch))

The copyright of individual parts of the supplement might differ from the article licence.

## 27 **Supplementary Text**

28

### 29 *S1: Stage drop-out test at PNR-1z*

30 Here, we perform a perturbation analysis to better understand how the EW-test responds  
31 to poorly-resolved cases. To do so, we start with the PNR-1z dataset and perform the EW-test  
32 using data from all the stages as a single cluster. We then omit the first stage from the cluster of  
33 earthquakes and then perform the EW-test again. This drop-out process is sequentially repeated  
34 until only the last stage is left. This perturbation is the same as those already presented in this  
35 manuscript, and similar to those from prior studies (Schultz et al., 2025).

36 We plot a smoothed version of this analysis (Figure S16). This analysis indicates that the  
37 best resolved cluster is (unsurprisingly) the one that includes all stage information, with a best-fit  
38  $n$ -exponent of  $\sim 1.6$ . As initial stages sequentially drop-out, the confidence in the cluster being  
39 bound generally decreases and the  $n$ -exponent also decreases. Eventually enough data is removed  
40 such that we fall below the thresholds for statistical confidence and an  $n$ -exponent of 0.5 is  
41 approached.

42 Generally, this observation supports our interpretation of bound-fractures and unbound-  
43 faults (Figure 13). In this drop-out analysis, omitting earlier stages would be expected to  
44 increasingly ignore the initial creation of the fracture network. In this sense, drop-out  
45 progressively emulates stimulation into a large pre-existing fracture network. Thus, an unbound  
46 response is expected in the limit of only considering the last stage – since there is already a large  
47 and extensive pre-existing fracture network for  $M_{\text{LRG}}$  events to grow into uninhibited. If enough  
48 drop-out stages are reincorporated back into the cluster, the response starts appearing tectonic-like  
49 (or X-like), since the (apparent) unbound growth eventually encounters an abrupt upper limit (and  
50 this limit is not well-resolved enough to sense its change with time). Next, an intermediate amount  
51 of drop-out would encounter this abrupt upper limit, and start to sense its change with time, but  
52 not well enough to accurately constrain the  $n$ -exponent. In the final limit, our data is well-resolved  
53 enough to accurately constrain the true  $n$ -exponent.

54 This highlights the importance of capturing the initial  $M_{\text{LRG}}$  events for accurate EW-test  
55 results for cases with volume-based  $M_{\text{MAX}}$ . Conversely, this also highlights a potential  
56 observational bias within the EW-test, regarding the accuracy of the  $n$ -exponent. Because of this,  
57 we favour the observational bias as the most likely explanation of the X-like  $n$ -exponent (Figure

58 15). We note that this observational bias will likely be relevant in realistic settings – such as for  
59 hydraulic fracturing stimulations starting in a perforated well. Potentially, this bias could be  
60 accounted for by including a y-intercept term to volume-based  $M_{MAX}$  relationships.

61

62 **Supplementary Figures**  
63

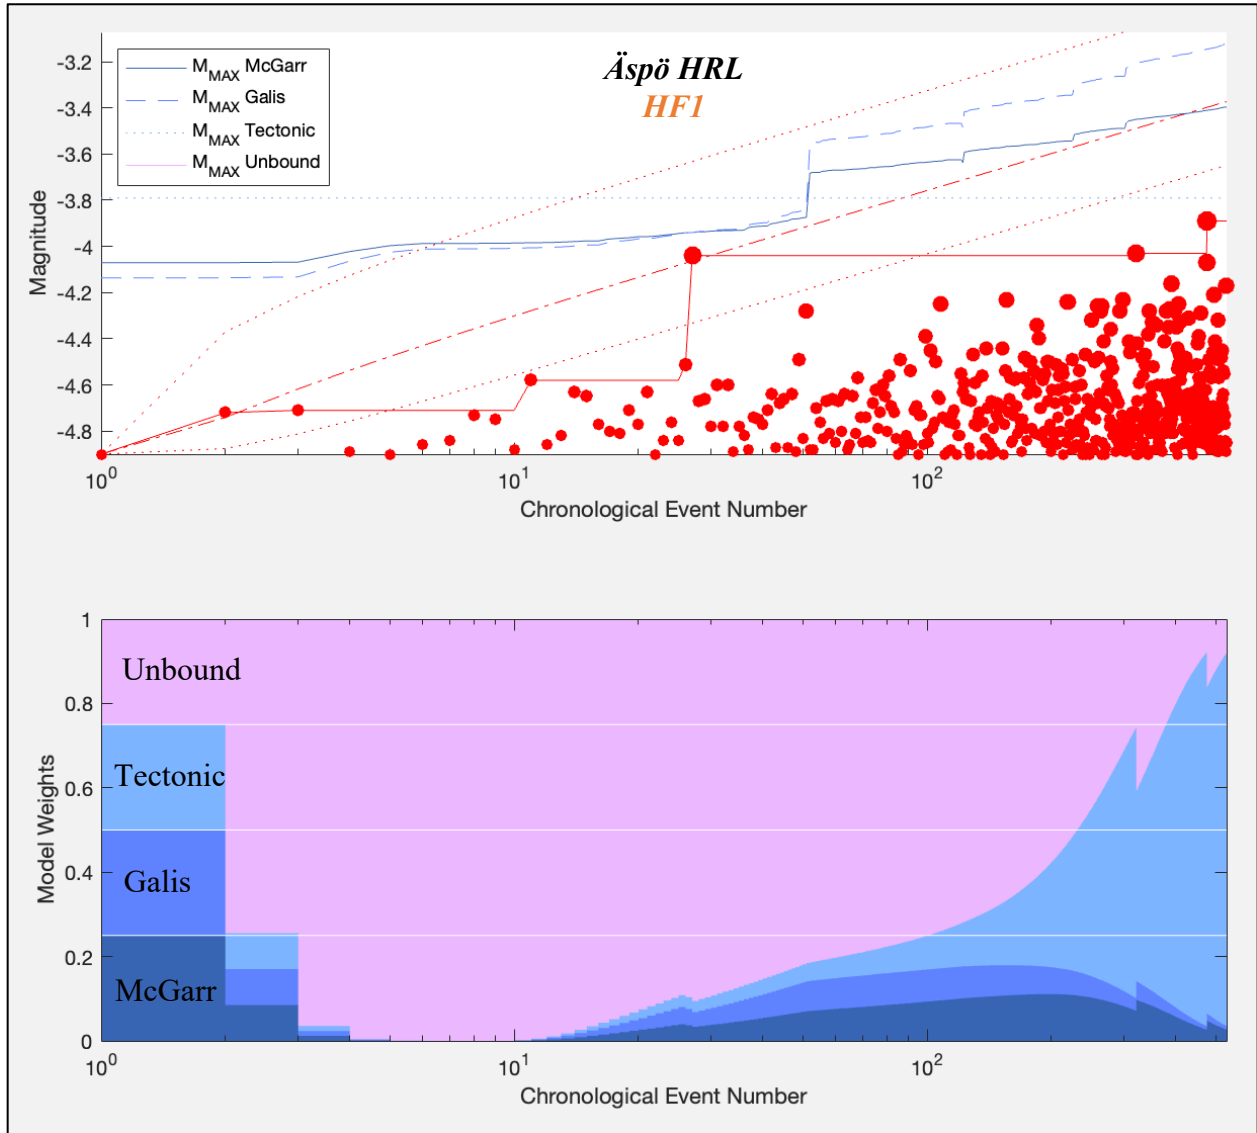

64  
65  
66 **Figure S1. Using the EW-test to discern between  $M_{MAX}$  models for HF1 at the Äspö HRL.** In  
67 the catalogue of earthquake magnitudes (red circles) and the observed  $M_{LRG}$   
68 sequence (red lines & circles), and expected  $M_{LRG}$  at the 10/50/90 percentiles (red dashed lines)  
69 are tested using three  $M_{MAX}$  assumptions (blue lines). In the bottom panel, AIC/BIC-based  
70 ensemble model weights (blue bars) using all data prior to each new  $M_{LRG}$  value are shown.  
71  
72

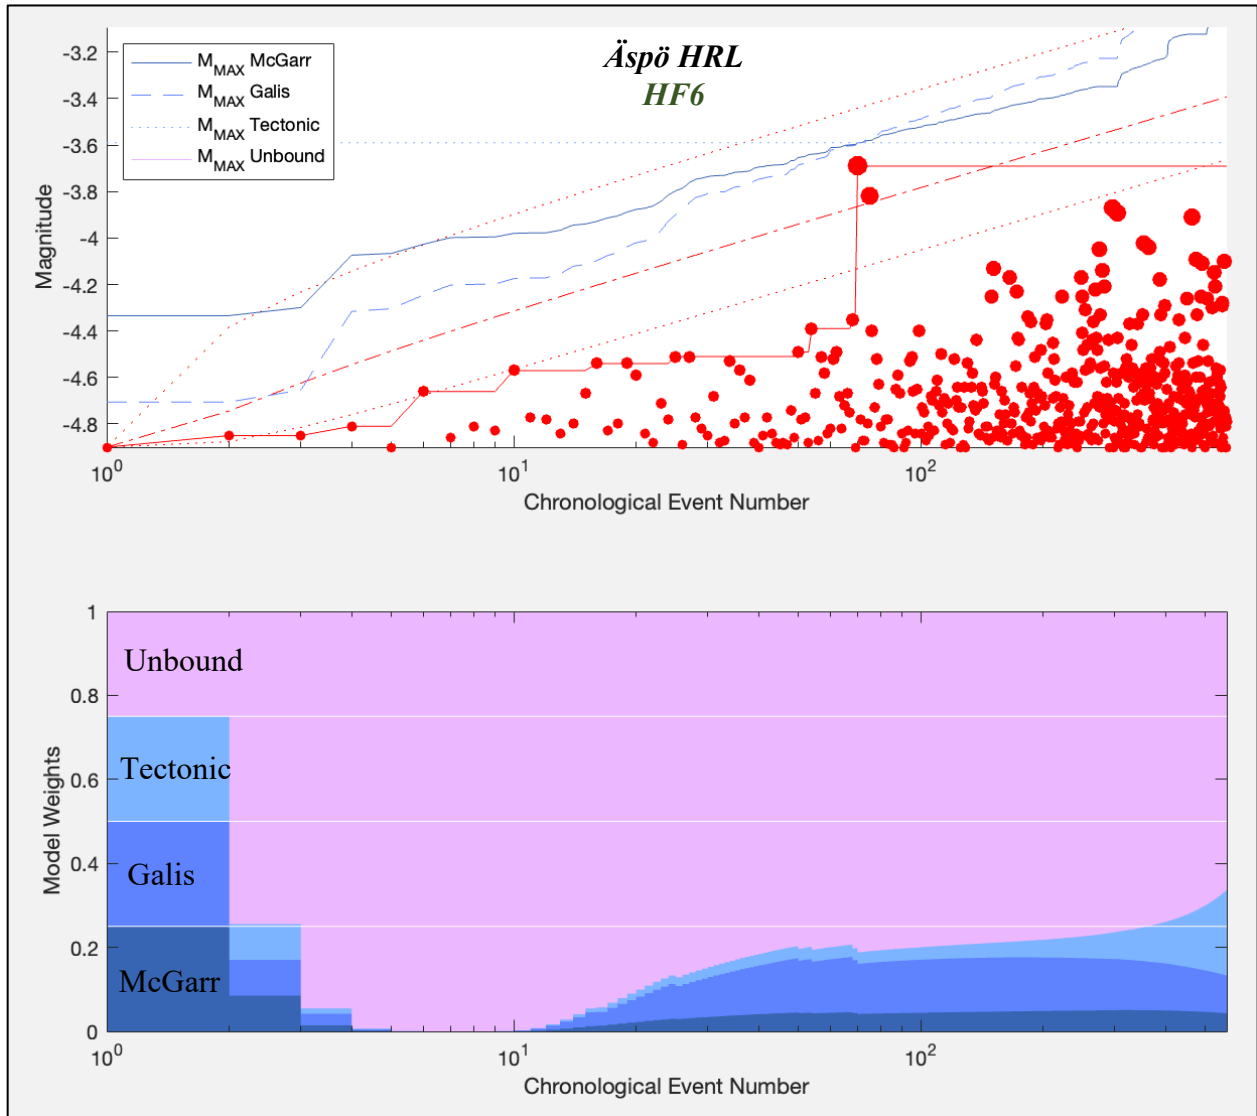

74

75

76 **Figure S2. Using the EW-test to discern between  $M_{MAX}$  models for HF6 at the Äspö HRL.**77 In the top panel, the catalogue of earthquake magnitudes (red circles), the observed  $M_{LRG}$  sequence78 (red lines & circles), and expected  $M_{LRG}$  at the 10/50/90 percentiles (red dashed lines) are tested79 using three  $M_{MAX}$  assumptions (blue lines). In the bottom panel, AIC/BIC-based ensemble model

80 weights (coloured bars) using all data prior to each new event are shown.

81

82

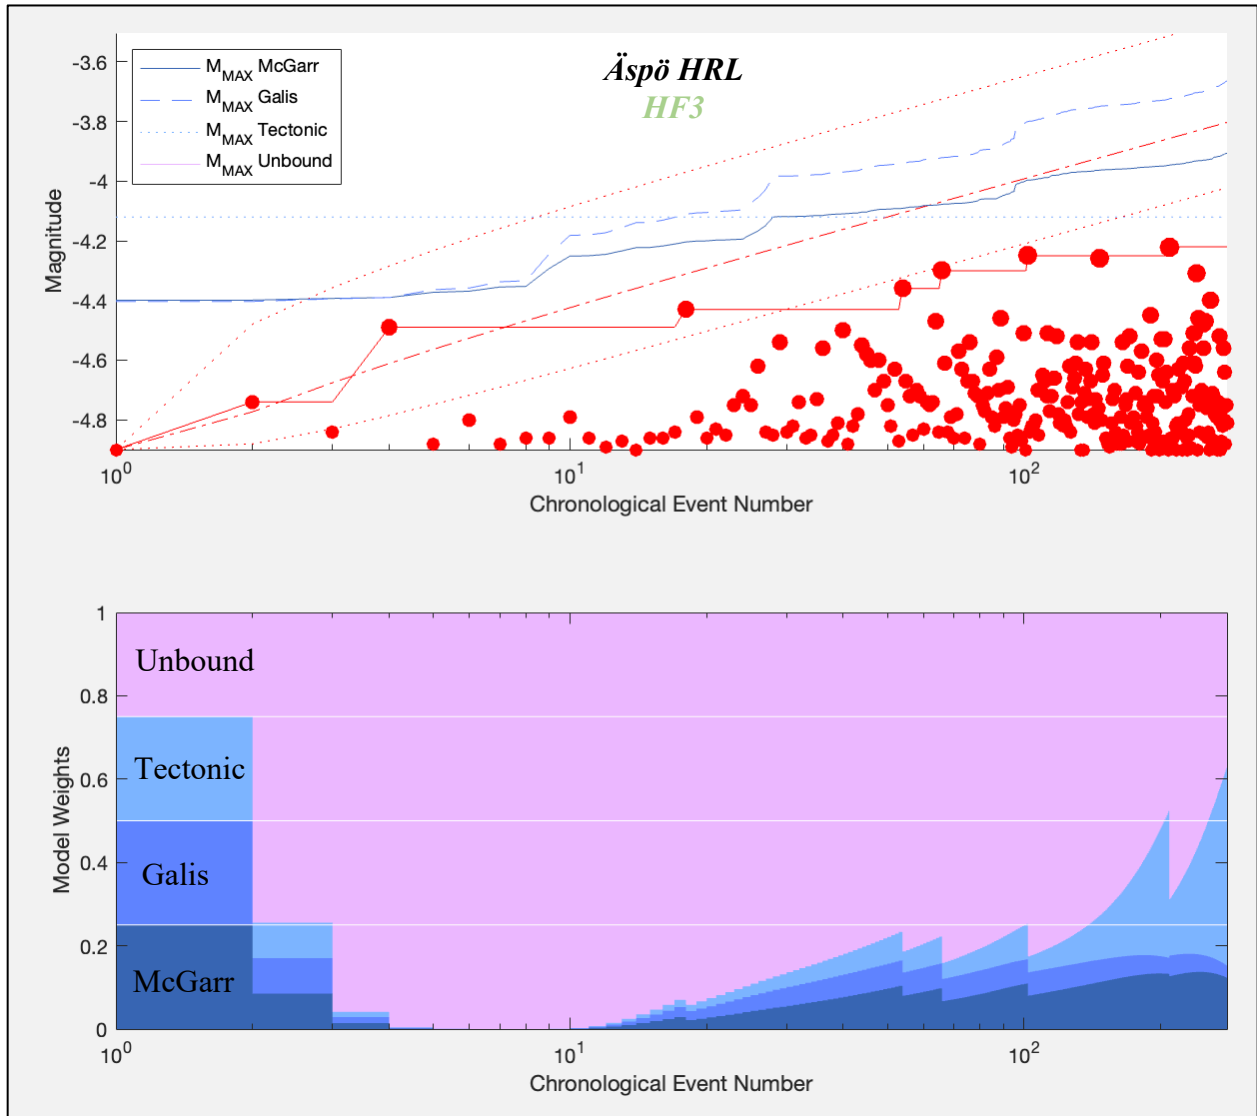

84  
85  
86  
87  
88  
89  
90  
91  
92

**Figure S3. Using the EW-test to discern between  $M_{MAX}$  models for HF3 at the Äspö HRL.** In the top panel, the catalogue of earthquake magnitudes (red circles), the observed  $M_{LRG}$  sequence (red lines & circles), and expected  $M_{LRG}$  at the 10/50/90 percentiles (red dashed lines) are tested using three  $M_{MAX}$  assumptions (blue lines). In the bottom panel, AIC/BIC-based ensemble model weights (coloured bars) using all data prior to each new event are shown.

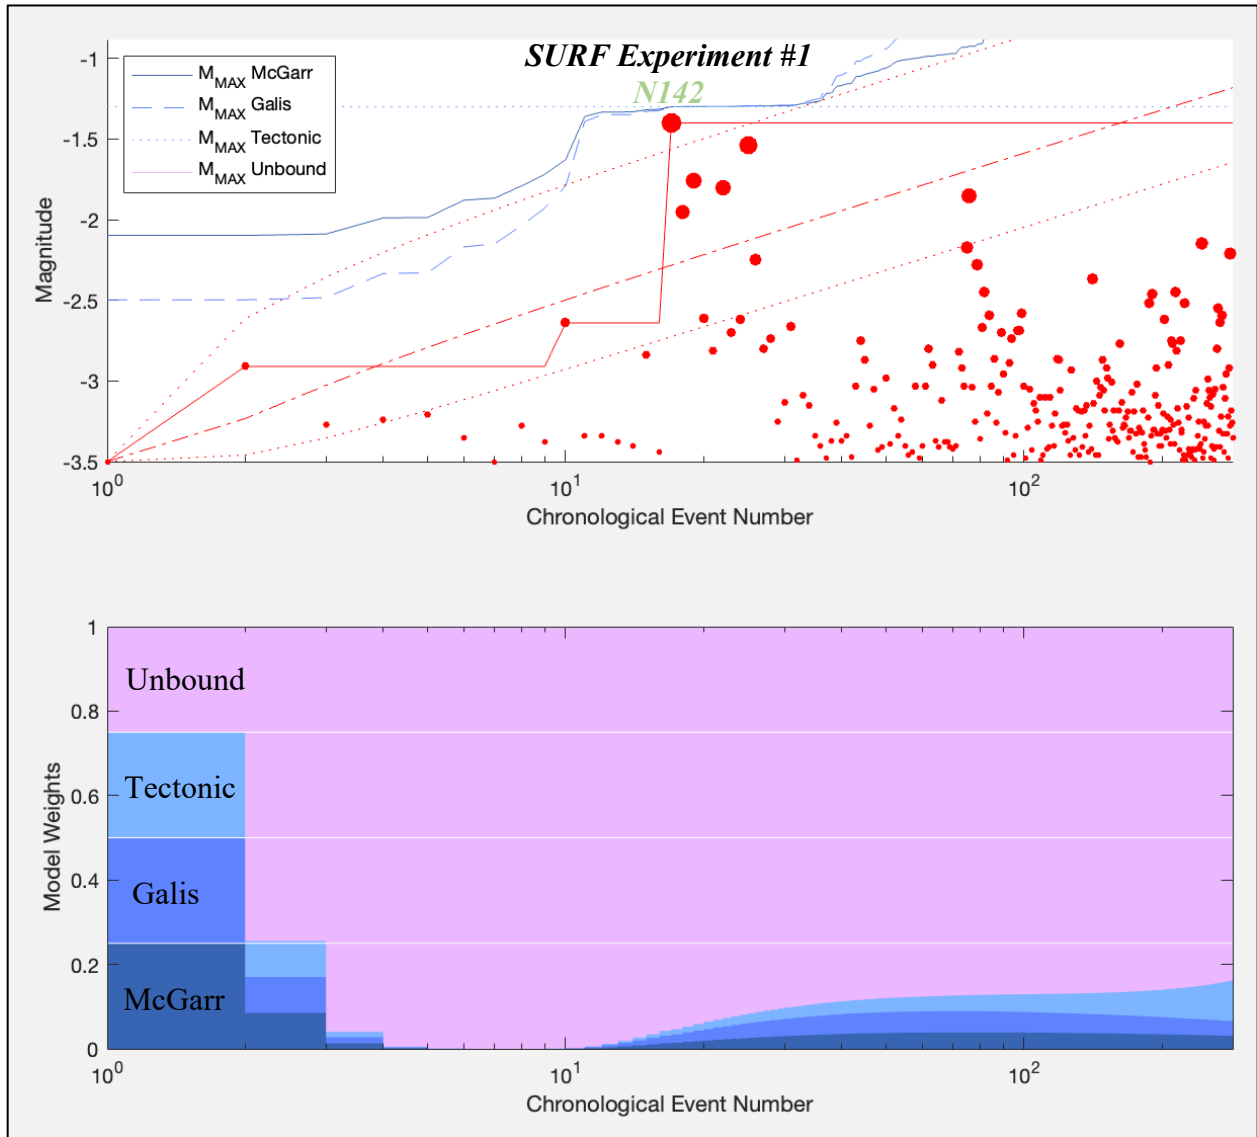

94  
 95  
 96  
 97  
 98  
 99  
 100  
 101  
 102

**Figure S4. Using the EW-test to discern between  $M_{MAX}$  models for N142 at SURF Experiment #1.** In the top panel, the catalogue of earthquake magnitudes (red circles), the observed  $M_{LRG}$  sequence (red lines & circles), and expected  $M_{LRG}$  at the 10/50/90 percentiles (red dashed lines) are tested using three  $M_{MAX}$  assumptions (blue lines). In the bottom panel, AIC/BIC-based ensemble model weights (coloured bars) using all data prior to each new event are shown.

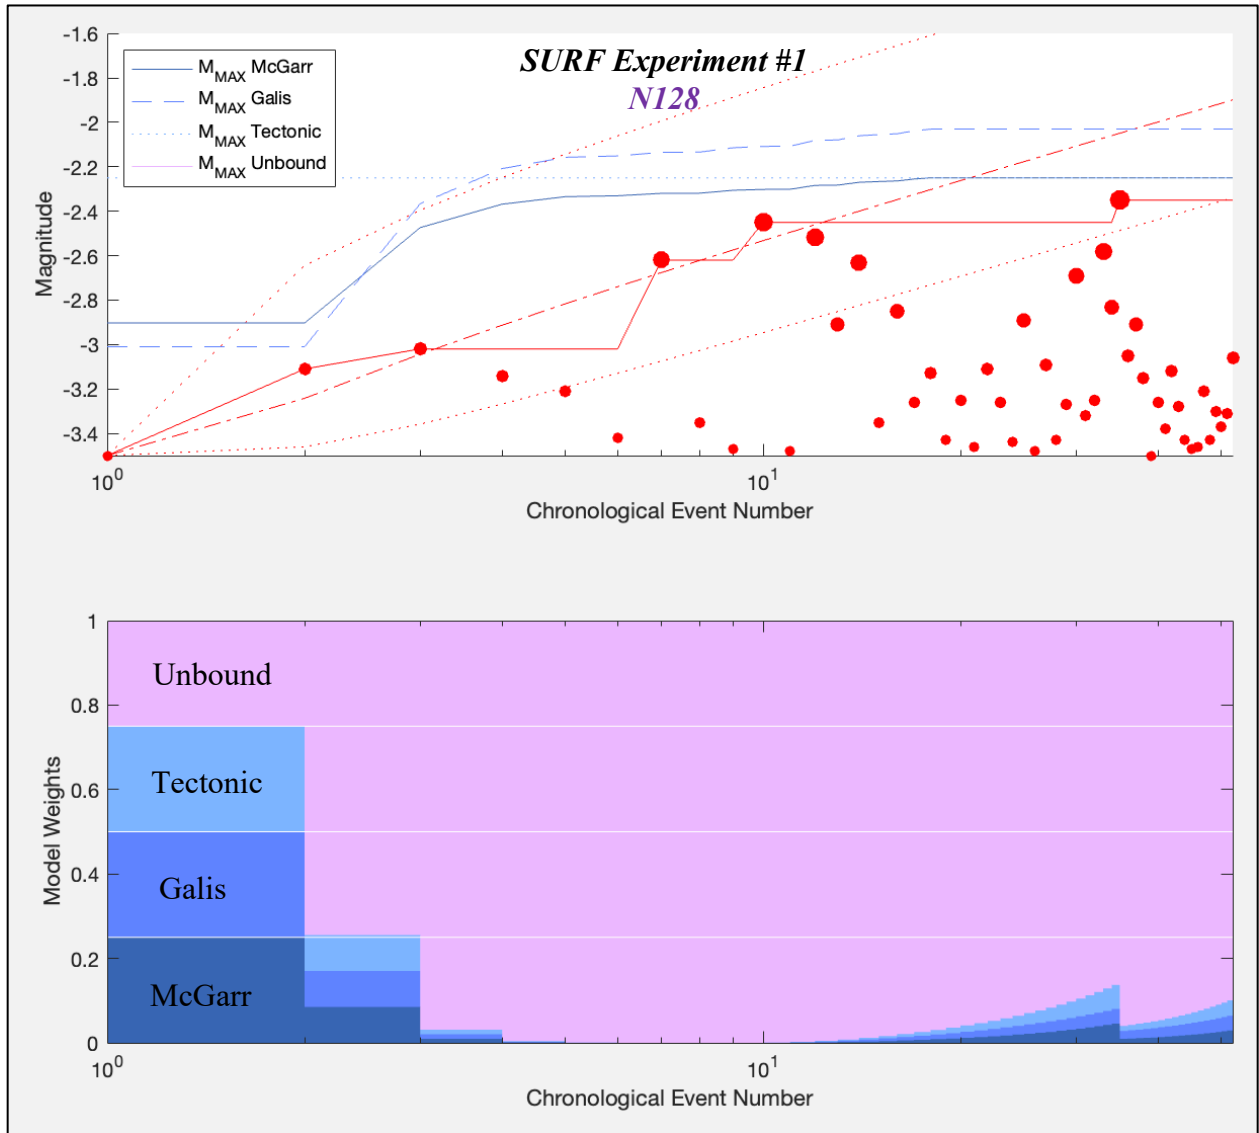

104  
 105  
 106  
 107  
 108  
 109  
 110  
 111  
 112

**Figure S5. Using the EW-test to discern between  $M_{MAX}$  models for N128 at SURF Experiment #1.** In the top panel, the catalogue of earthquake magnitudes (red circles), the observed  $M_{LRG}$  sequence (red lines & circles), and expected  $M_{LRG}$  at the 10/50/90 percentiles (red dashed lines) are tested using three  $M_{MAX}$  assumptions (blue lines). In the bottom panel, AIC/BIC-based ensemble model weights (coloured bars) using all data prior to each new event are shown.

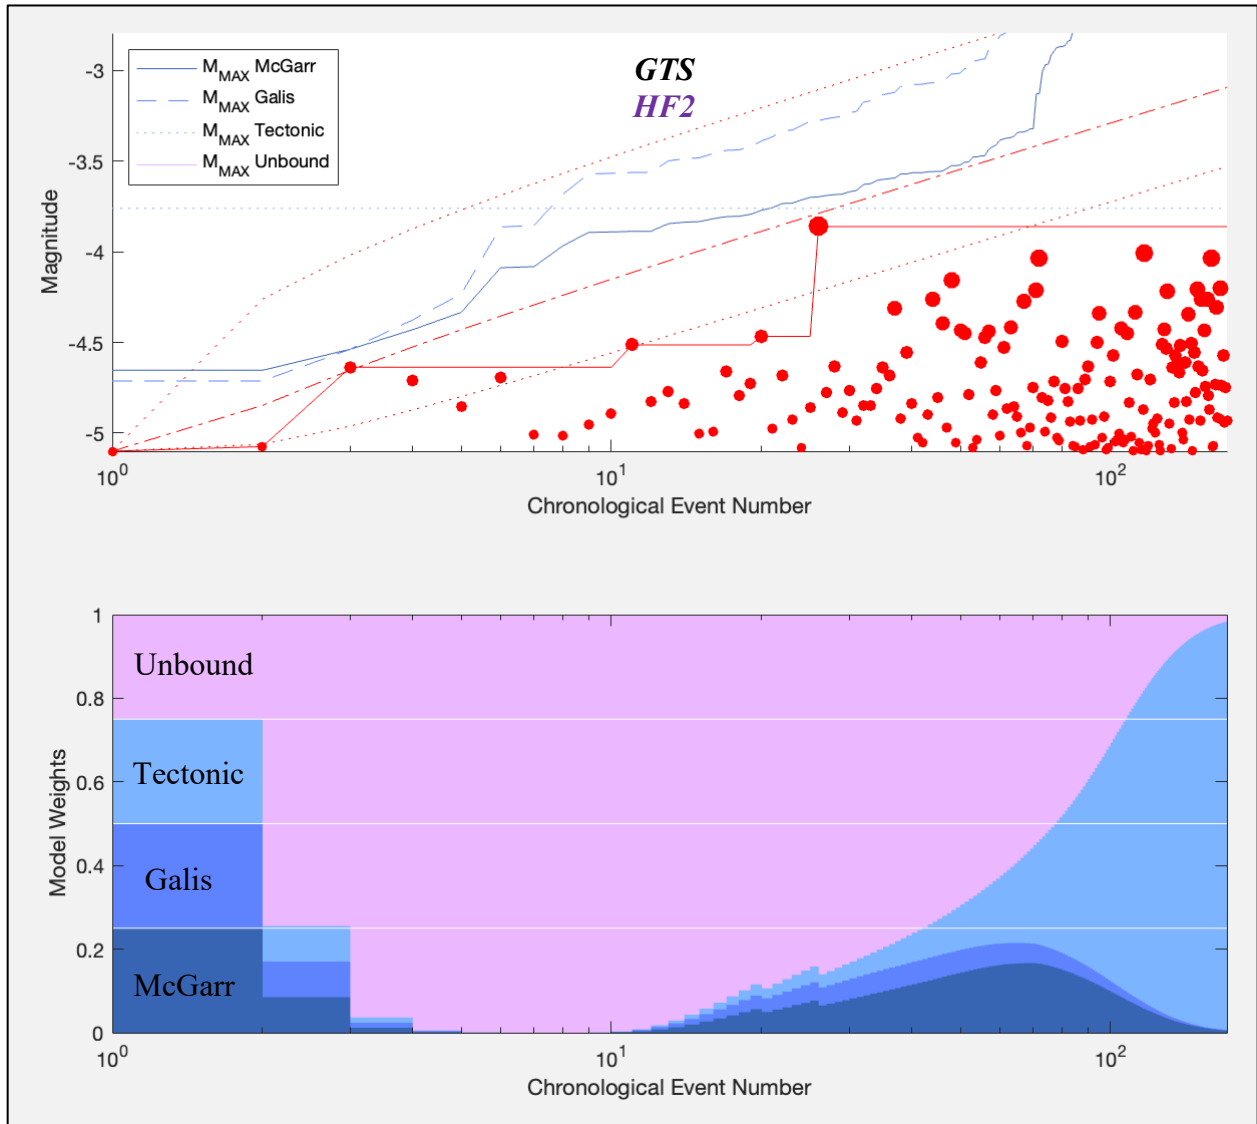

114  
 115  
 116  
 117  
 118  
 119  
 120  
 121  
 122

**Figure S6. Using the EW-test to discern between  $M_{MAX}$  models for HF2 at the GTS.** In the catalogue of earthquake magnitudes (red circles), the observed  $M_{LRG}$  sequence (red lines & circles), and expected  $M_{LRG}$  at the 10/50/90 percentiles (red dashed lines) are tested using three  $M_{MAX}$  assumptions (blue lines). In the bottom panel, AIC/BIC-based ensemble model weights (coloured bars) using all data prior to each new event are shown.

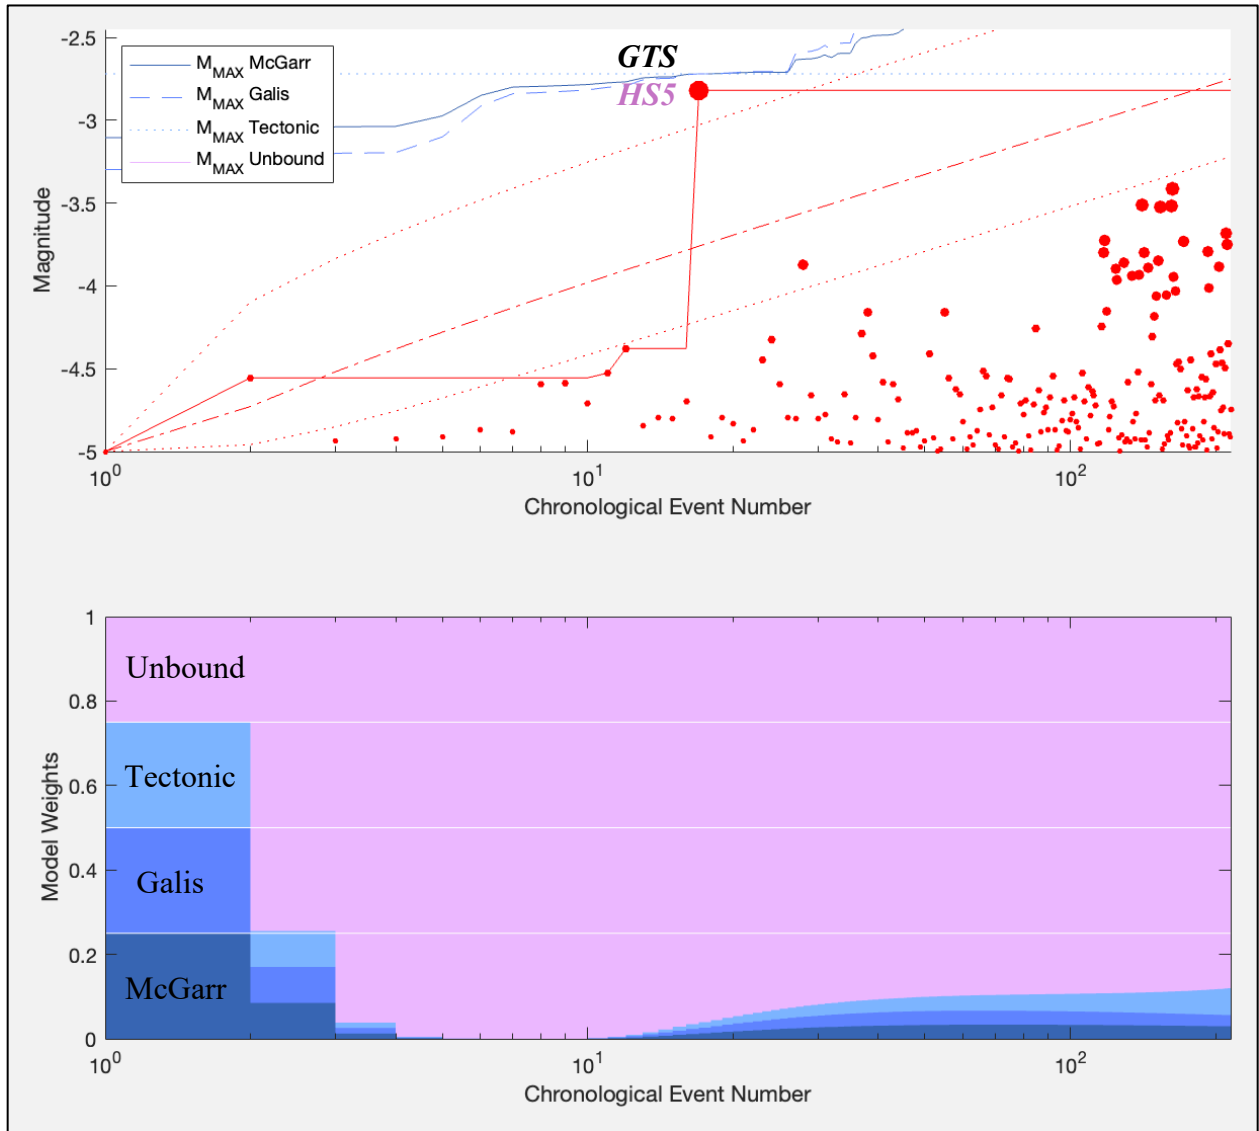

124  
 125  
 126  
 127  
 128  
 129  
 130  
 131  
 132

**Figure S7. Using the EW-test to discern between  $M_{MAX}$  models for HS5 at the GTS.** In the top panel, the catalogue of earthquake magnitudes (red circles), the observed  $M_{LRG}$  sequence (red lines & circles), and expected  $M_{LRG}$  at the 10/50/90 percentiles (red dashed lines) are tested using three  $M_{MAX}$  assumptions (blue lines). In the bottom panel, AIC/BIC-based ensemble model weights (coloured bars) using all data prior to each new event are shown.

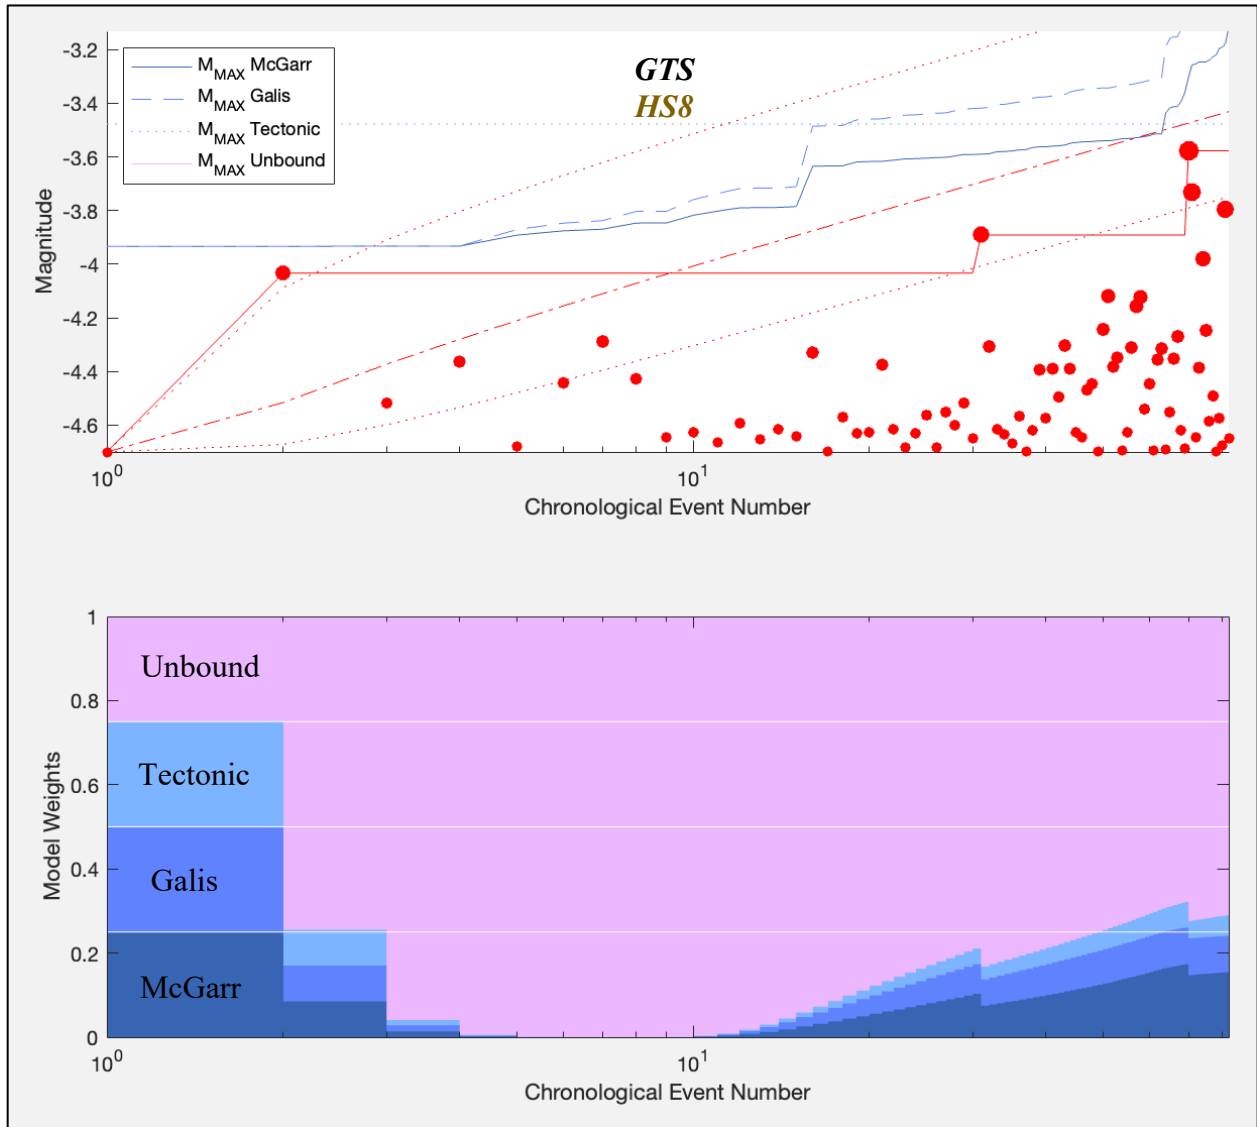

134  
 135  
 136  
 137  
 138  
 139  
 140  
 141  
 142

**Figure S8. Using the EW-test to discern between  $M_{MAX}$  models for HS8 at the GTS.** In the catalogue of earthquake magnitudes (red circles), the observed  $M_{LRG}$  sequence (red lines & circles), and expected  $M_{LRG}$  at the 10/50/90 percentiles (red dashed lines) are tested using three  $M_{MAX}$  assumptions (blue lines). In the bottom panel, AIC/BIC-based ensemble model weights (coloured bars) using all data prior to each new event are shown.

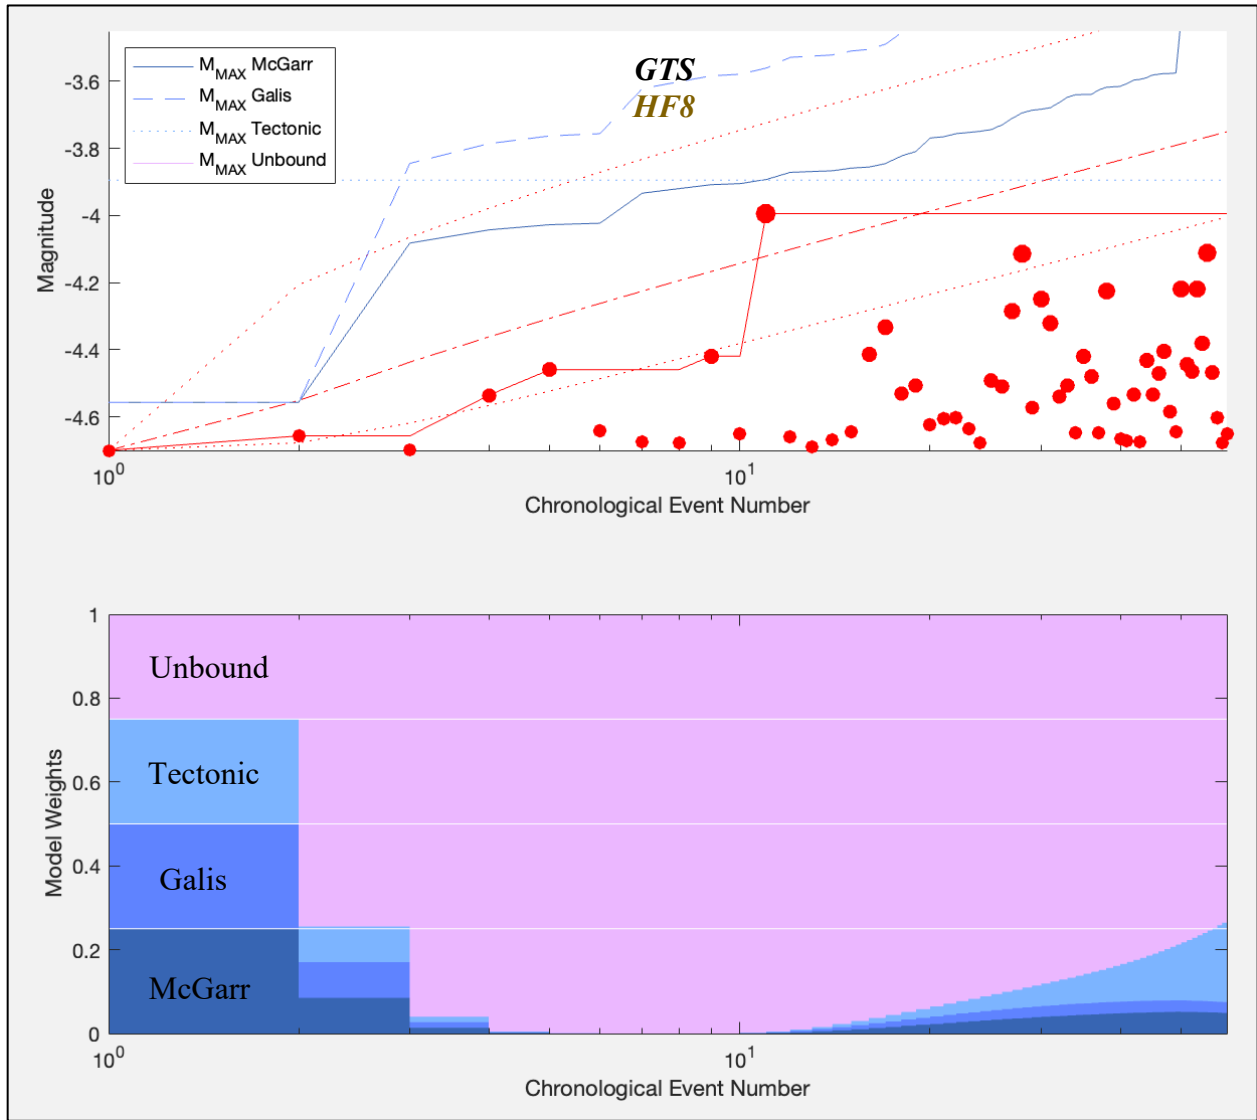

144  
 145  
 146  
 147  
 148  
 149  
 150  
 151  
 152

**Figure S9. Using the EW-test to discern between  $M_{MAX}$  models for HF8 at the GTS.** In the catalogue of earthquake magnitudes (red circles), the observed  $M_{LRG}$  sequence (red lines & circles), and expected  $M_{LRG}$  at the 10/50/90 percentiles (red dashed lines) are tested using three  $M_{MAX}$  assumptions (blue lines). In the bottom panel, AIC/BIC-based ensemble model weights (coloured bars) using all data prior to each new event are shown.

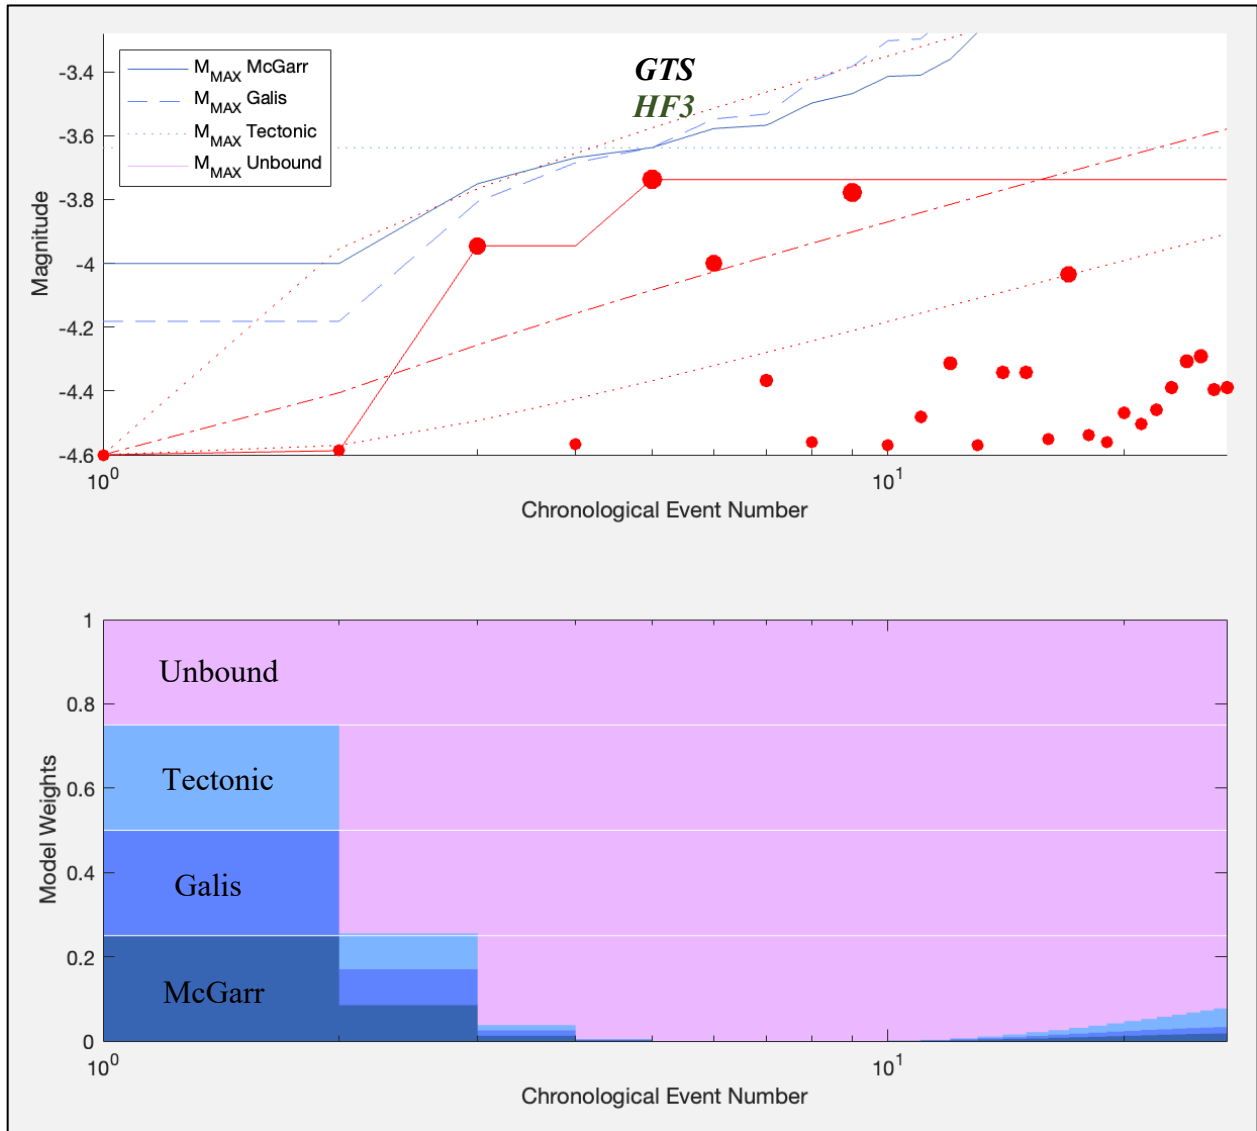

154  
 155  
 156  
 157  
 158  
 159  
 160  
 161  
 162

**Figure S10. Using the EW-test to discern between  $M_{MAX}$  models for HF3 at the GTS.** In the top panel, the catalogue of earthquake magnitudes (red circles), the observed  $M_{LRG}$  sequence (red lines & circles), and expected  $M_{LRG}$  at the 10/50/90 percentiles (red dashed lines) are tested using three  $M_{MAX}$  assumptions (blue lines). In the bottom panel, AIC/BIC-based ensemble model weights (coloured bars) using all data prior to each new event are shown.

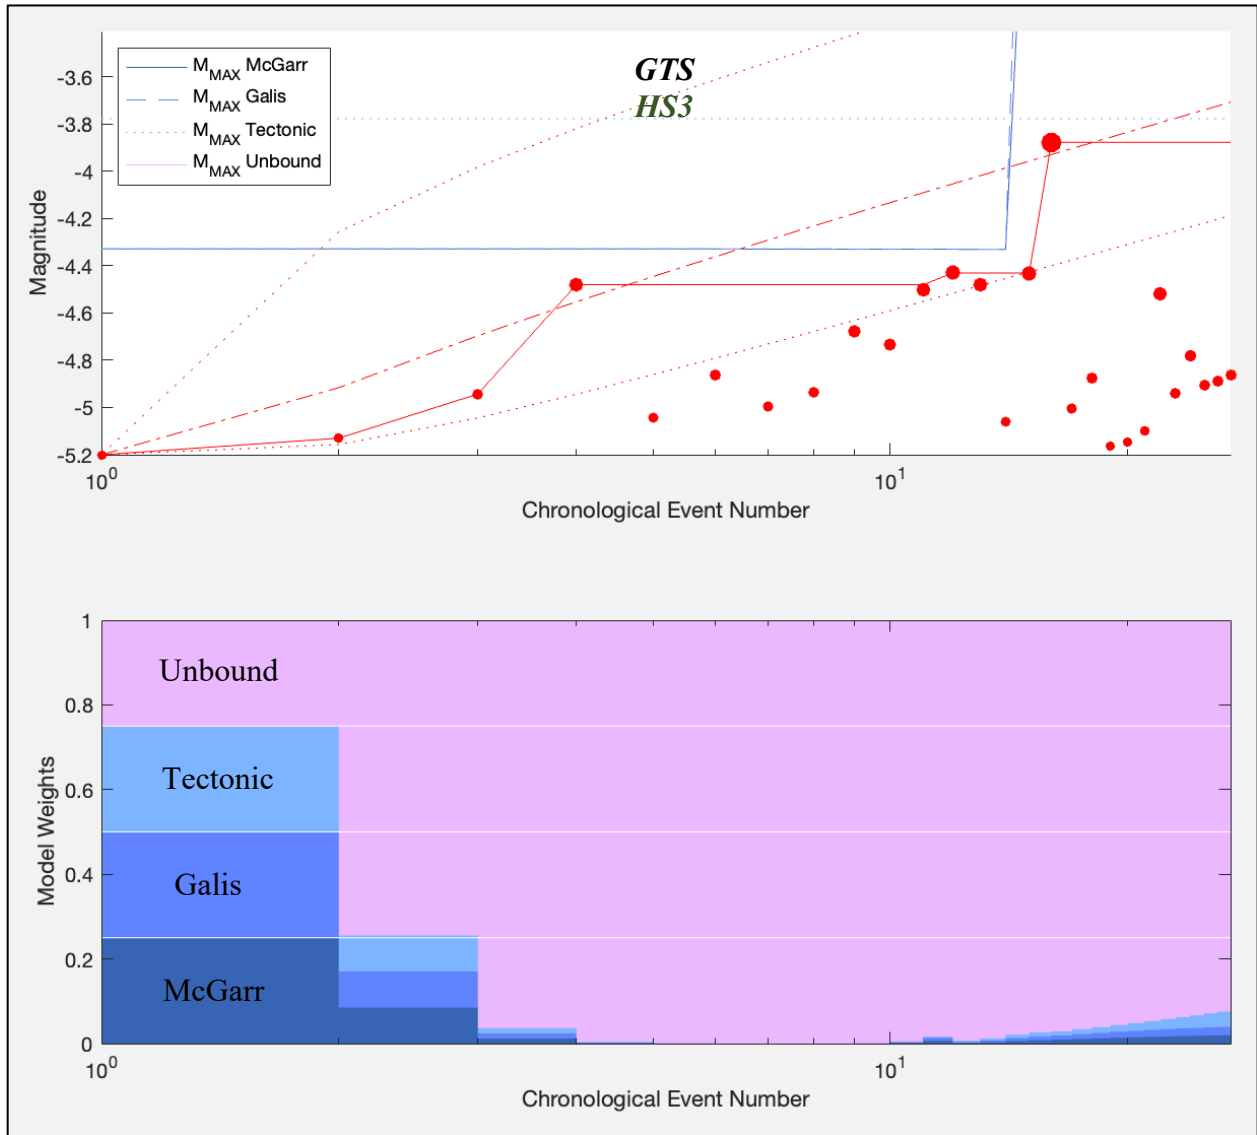

164  
 165  
 166  
 167  
 168  
 169  
 170  
 171  
 172

**Figure S11. Using the EW-test to discern between  $M_{MAX}$  models for HS3 at the GTS.** In the catalogue of earthquake magnitudes (red circles), the observed  $M_{LRG}$  sequence (red lines & circles), and expected  $M_{LRG}$  at the 10/50/90 percentiles (red dashed lines) are tested using three  $M_{MAX}$  assumptions (blue lines). In the bottom panel, AIC/BIC-based ensemble model weights (coloured bars) using all data prior to each new event are shown.

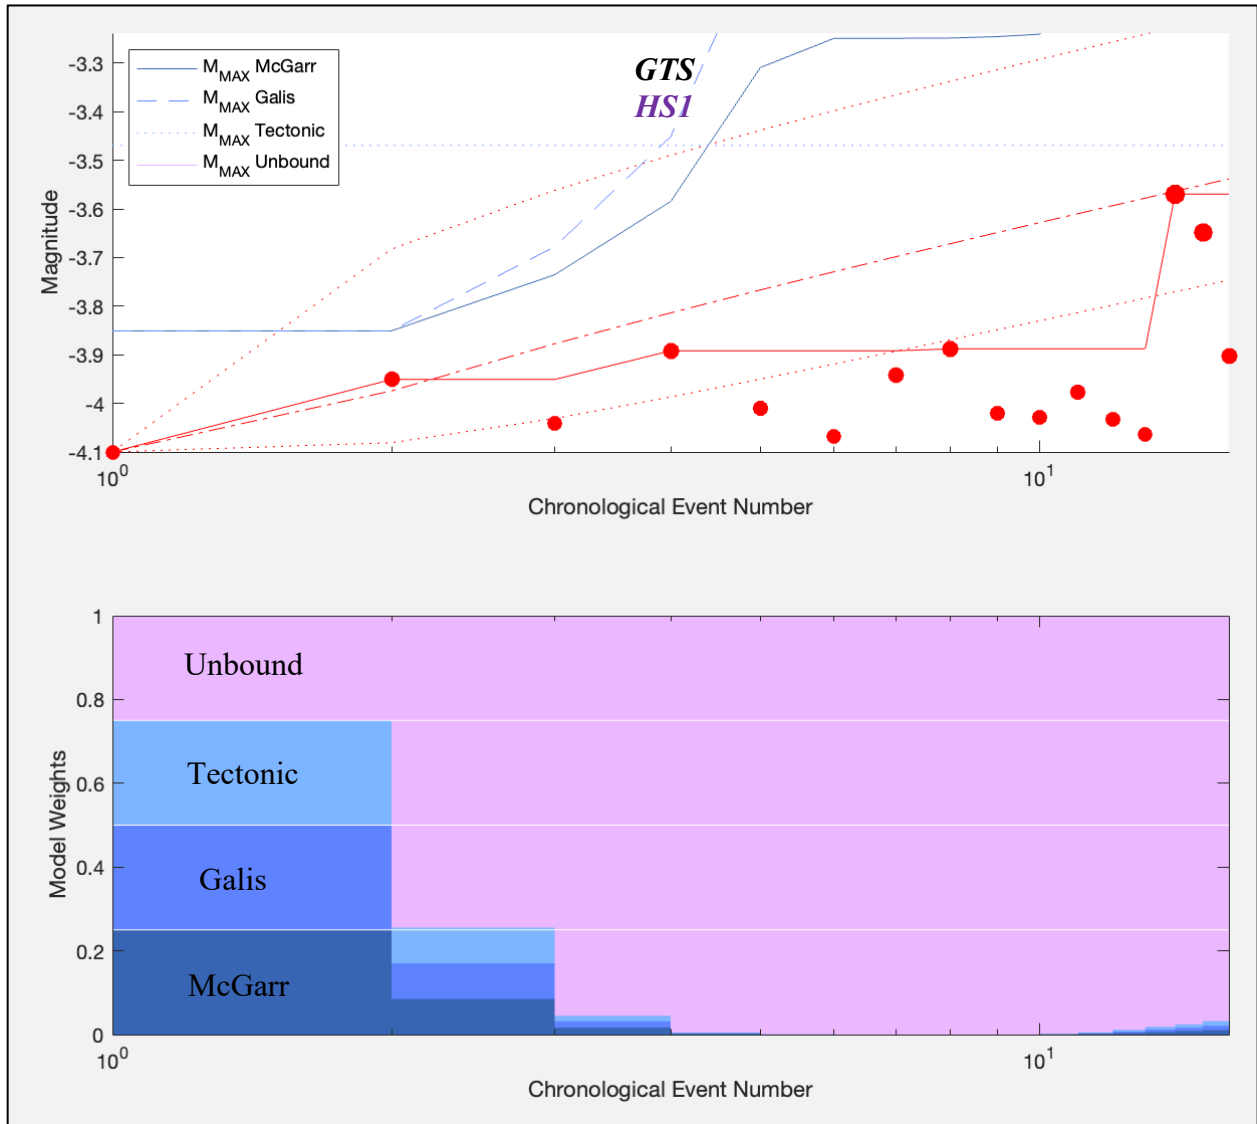

174  
 175  
 176  
 177  
 178  
 179  
 180  
 181  
 182

**Figure S12. Using the EW-test to discern between  $M_{MAX}$  models for HS1 at the GTS** In the catalogue of earthquake magnitudes (red circles), the observed  $M_{LRG}$  sequence (red lines & circles), and expected  $M_{LRG}$  at the 10/50/90 percentiles (red dashed lines) are tested using three  $M_{MAX}$  assumptions (blue lines). In the bottom panel, AIC/BIC-based ensemble model weights (coloured bars) using all data prior to each new event are shown.

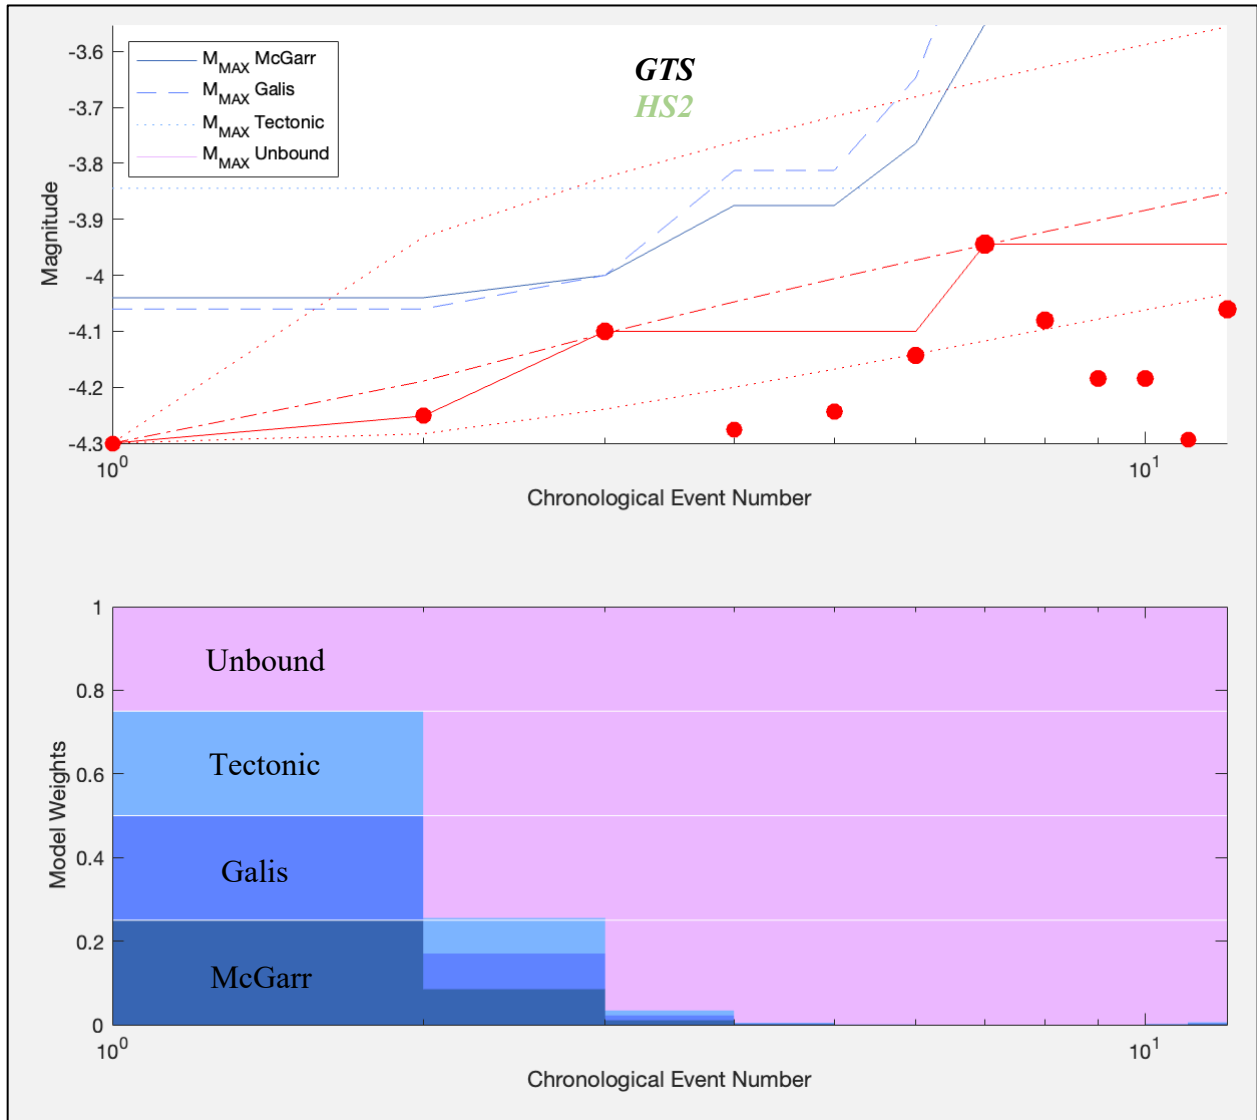

184  
 185  
 186  
 187  
 188  
 189  
 190  
 191  
 192

**Figure S13. Using the EW-test to discern between  $M_{MAX}$  models for HS2 at the GTS.** In the top panel, the catalogue of earthquake magnitudes (red circles), the observed  $M_{LRG}$  sequence (red lines & circles), and expected  $M_{LRG}$  at the 10/50/90 percentiles (red dashed lines) are tested using three  $M_{MAX}$  assumptions (blue lines). In the bottom panel, AIC/BIC-based ensemble model weights (coloured bars) using all data prior to each new event are shown.

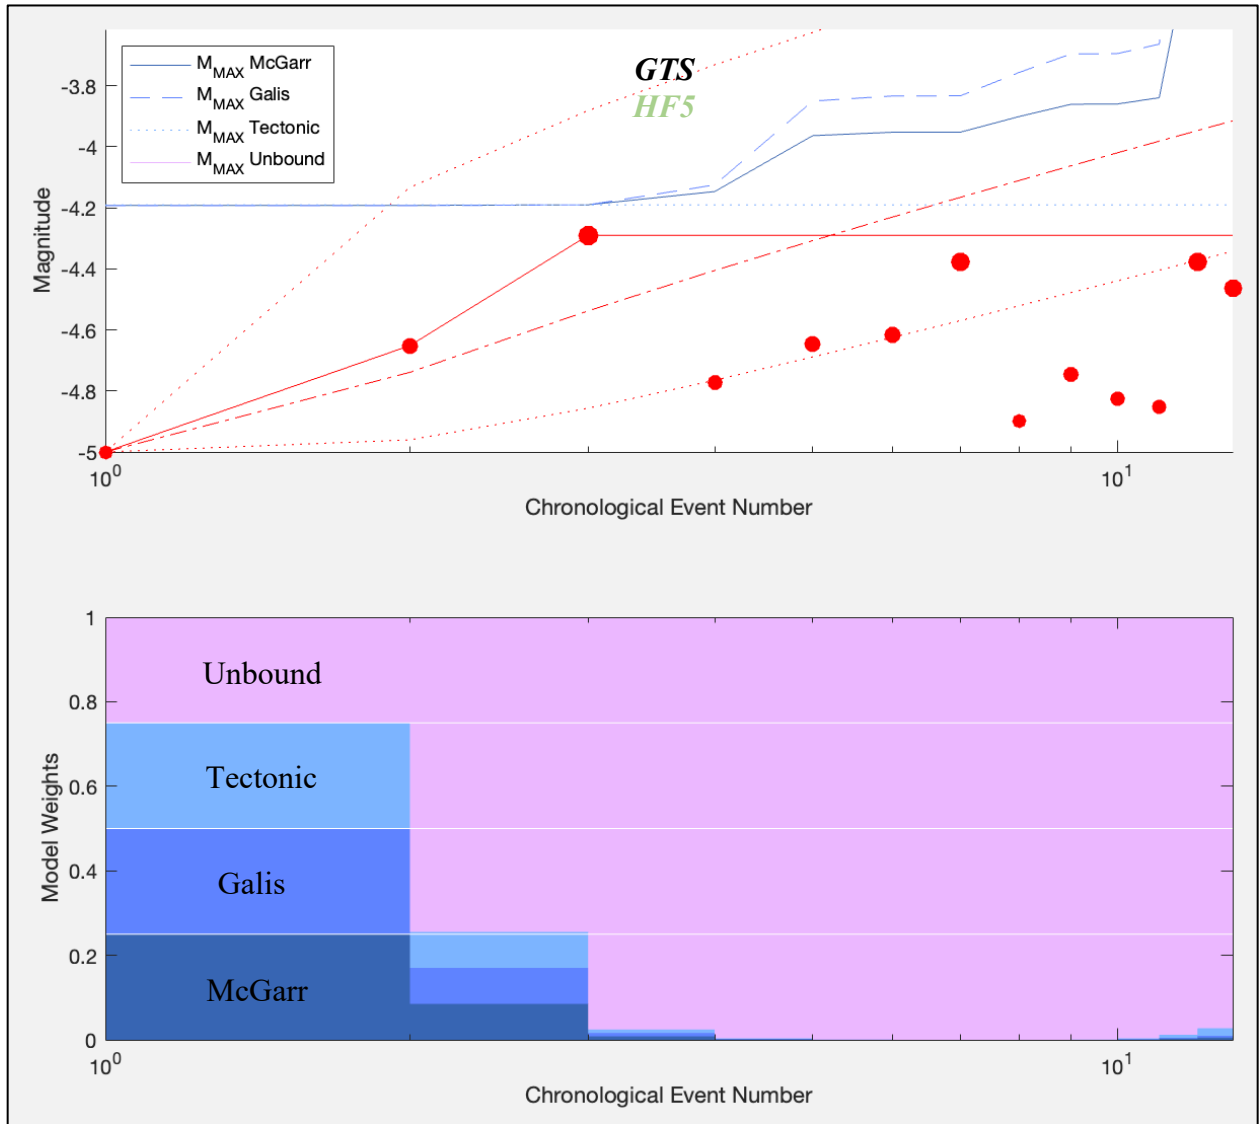

194  
 195  
 196  
 197  
 198  
 199  
 200  
 201  
 202

**Figure S14. Using the EW-test to discern between  $M_{MAX}$  models for HF5 at the GTS.** In the catalogue of earthquake magnitudes (red circles), the observed  $M_{LRG}$  sequence (red lines & circles), and expected  $M_{LRG}$  at the 10/50/90 percentiles (red dashed lines) are tested using three  $M_{MAX}$  assumptions (blue lines). In the bottom panel, AIC/BIC-based ensemble model weights (coloured bars) using all data prior to each new event are shown.

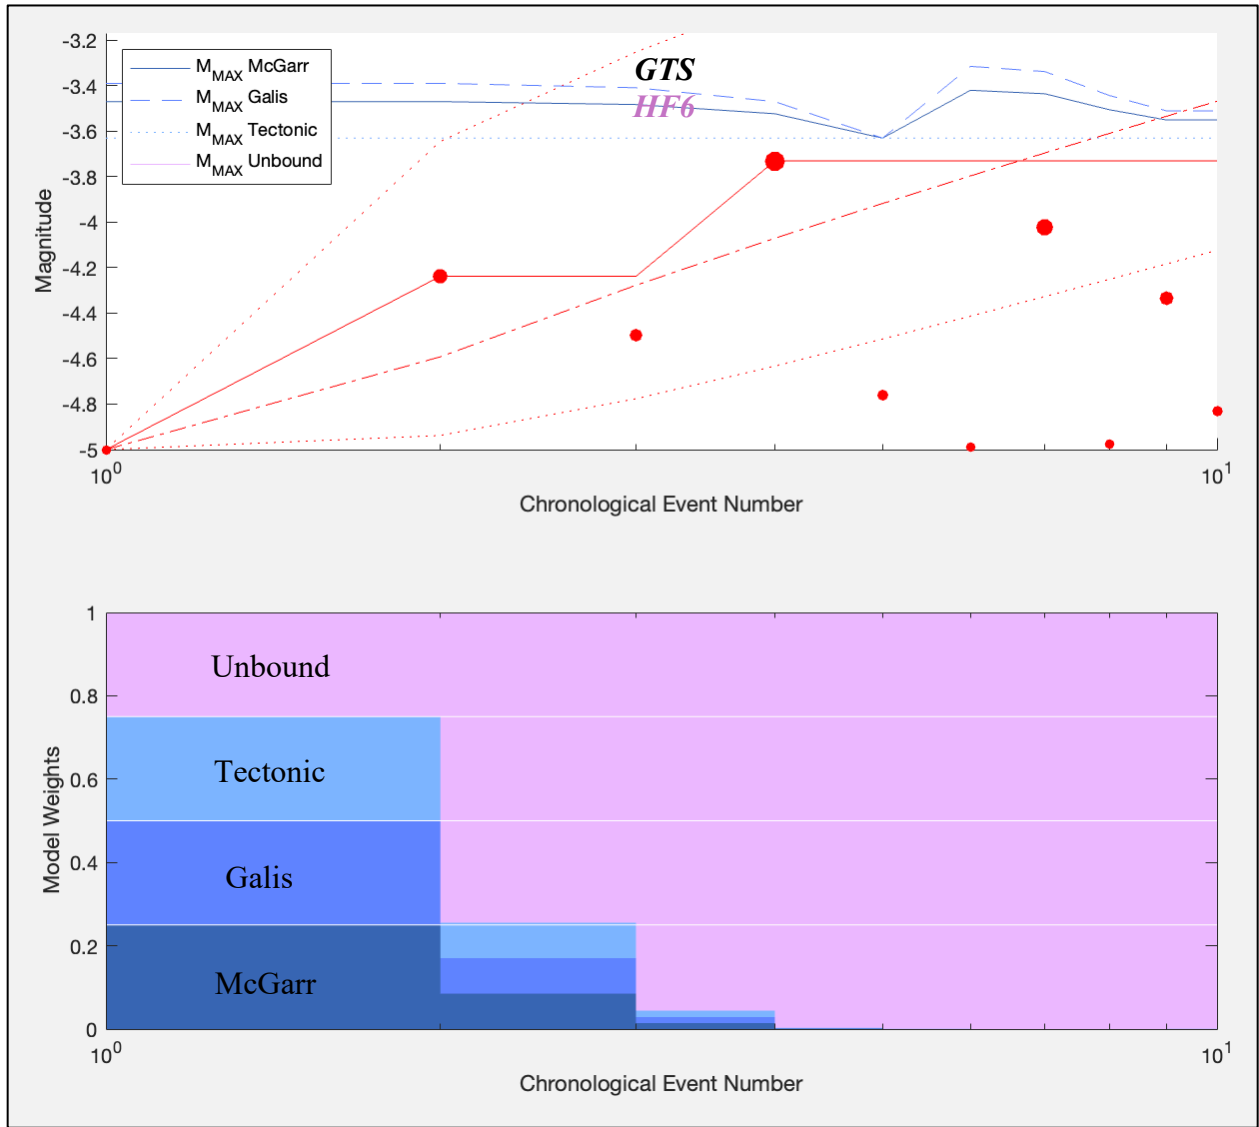

204  
 205  
 206  
 207  
 208  
 209  
 210  
 211  
 212

**Figure S15. Using the EW-test to discern between  $M_{MAX}$  models for HF6 at the GTS.** In the top panel, the catalogue of earthquake magnitudes (red circles), the observed  $M_{LRG}$  sequence (red lines & circles), and expected  $M_{LRG}$  at the 10/50/90 percentiles (red dashed lines) are tested using three  $M_{MAX}$  assumptions (blue lines). In the bottom panel, AIC/BIC-based ensemble model weights (coloured bars) using all data prior to each new event are shown.

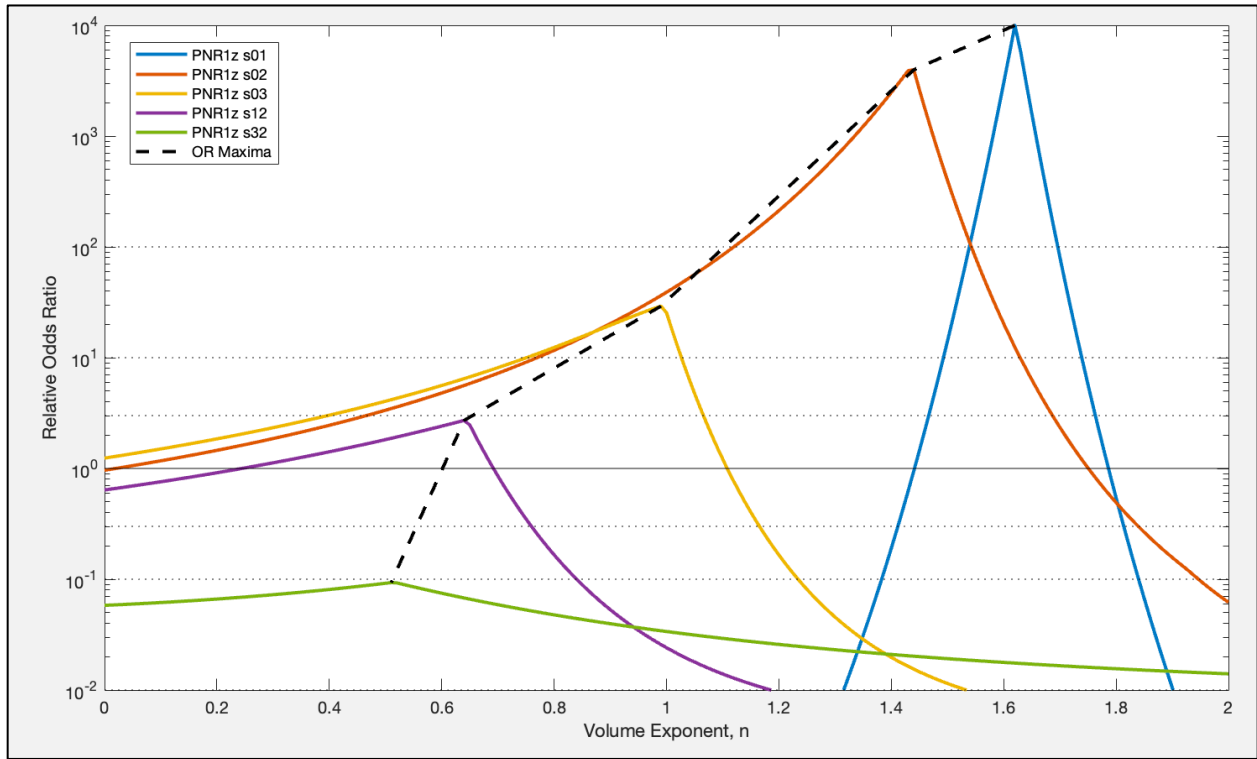

214  
 215  
 216  
 217  
 218  
 219  
 220  
 221  
 222  
 223  
 224

**Figure S16. Drop-out test applied to the PNR-1z data.** The EW-test is repeated, with initial stages being sequentially omitted. Odds ratios of drop-out clusters (solid lines; relative to the unbound null hypothesis) are plotted alongside statistical confidence thresholds (horizontal dotted lines). The trend of relative odds ratio maxima, as a function of drop-out stages, is also highlighted (dashed black line). Note that relative odds ratios are capped at  $10^4$  to facilitate an easier comparison via plotting. See also Figure 14b.
